1 Immune deposit and vasculopathy in metabolic-active lung tissues of patients with  
2 pulmonary tuberculosis

3

4 Hui Ma<sup>1</sup>†, Lin Wang<sup>1</sup>†, Zilu Wen<sup>1</sup>, Xinchun Chen<sup>2</sup>, Haiying Liu<sup>3</sup>, Shulin Zhang<sup>1</sup>, Jianqing  
5 Xu<sup>1</sup>, Yanzheng Song<sup>1</sup>#, Ka-Wing Wong<sup>1</sup>#

6

7 1. Shanghai Public Health Clinical Center, Shanghai, China

8 2. Shenzhen University School of Medicine, Shenzhen, China

9 3. Institute of Pathogen Biology at Chinese Academy of Medical Sciences, Beijing,  
10 China

11

12 Address correspondence to Ka-Wing Wong, [kwong@gmail.com](mailto:kwong@gmail.com) and Yanzheng Song,  
13 [yanzhengsong@163.com](mailto:yanzhengsong@163.com)

14

15 † These authors contributed equally (listed in alphabetical order)

16

17 Keywords: tuberculosis, inflammation, immune-complex, autoimmunity

18

19 Running title: Autoimmunity in inflamed lungs of patients with TB

20

21 **ABSTRACT**

22 Metabolic activity in pulmonary lesion is associated with disease severity and relapse  
23 risk in tuberculosis. However, the nature of the metabolic activity associated with  
24 tuberculosis in humans remains unclear. Previous works indicate that tuberculosis  
25 bears resemblance transcriptionally with systemic lupus erythematosus in peripheral  
26 blood, except that the plasma cell component was absent in tuberculosis. Here we  
27 reported that the missing transcriptional component was present within the metabolic  
28 active tissues in the lung of patients with sputum culture-negative tuberculosis, within  
29 which increased levels of circulating immune complexes and anti-dsDNA antibodies  
30 were found relative to nearby non-metabolic active tissues. Histological examination  
31 revealed specific vascular deposition of immune complexes, neutrophil extracellular  
32 traps, and vascular necrosis in the metabolic-active tissue. Thus, tuberculosis-initiated  
33 metabolic activity was associated with hyperactive antibody responses and vascular  
34 pathology, and shared features with systemic lupus erythematosus and other  
35 autoimmune diseases. We discussed these observations in the context of earlier  
36 literatures demonstrating that similar effects could be induced in humans and animal  
37 models by complete freund's adjuvant, the most potent antibody response inducer ever  
38 reported. Our small case series, if verified in a larger size study, might help inform host-  
39 directed therapies to alleviate disease progression and augment treatment efficacy.

40

41 **IMPORTANCE** In patients with pulmonary tuberculosis, lung tissues were destroyed by  
42 a hyperactive inflammatory response towards *M. tuberculosis*. The mechanisms  
43 underlying the inflammatory response are still poorly understood. Using 18F-FDG  
44 avidity as a surrogate marker of inflammation, we have identified that hyper-inflamed  
45 tissues possessed features associated with systemic lupus erythematosus: gene  
46 expression signatures of plasma cell and immunoglobulins and increased levels of anti-  
47 dsDNA antibodies, immune deposits, and vasculopathy. This observation might suggest  
48 an explanation to why patients with tuberculosis share more gene expression signatures  
49 with autoimmune diseases than infectious diseases and why they are more likely to  
50 develop autoimmune diseases. Defining the inflammatory responses at the lesion could  
51 help inform host-directed therapies to intervene disease progression or even accelerate  
52 cure.

53

## 54 INTRODUCTION

55 Patients with tuberculosis frequently have persistent inflammation in their lungs, as  
56 indicated by positron emission/computed tomography (PET/CT) for 18F-fluoro-2-deoxy-  
57 D-glucose (FDG) avidity, despite having a negative sputum culture for *M. tuberculosis* at  
58 the end of anti-tuberculosis regimen (1). This FDG-avid inflammation is associated with  
59 disease severity and relapse risk of tuberculosis (1, 2). The nature of the lesion  
60 inflammation remains unclear. Understanding such nature would provide insights on the  
61 nature of tuberculosis and additionally on how peripheral blood response in patients  
62 with tuberculosis might be related to the tissue inflammation.

63

64 Patients with tuberculosis are known to have a blood transcriptional signature similar to  
65 what patients with systemic lupus erythematosus (SLE) have, but notably lack the  
66 plasma cell transcriptional component present in the disease (3, 4). SLE is an immune  
67 complex disease involving overproduction of autoantibodies and capillary deposition of  
68 immune complexes that cause pathology. Here we examined FDG-avid and nearby  
69 non-avid lung tissues from patients with sputum culture-negative tuberculosis for the  
70 transcriptions of genes related to plasma cells and immunoglobulins, and for the  
71 presence of capillary immune deposit and vasculopathy.

72

## 73 RESULTS

74 FDG-avid and non-avid tissues from five subjects were previously analyzed by RNA  
75 sequencing and the dataset was deposited in NCBI database (GSE158767). Pathway  
76 analysis of genes from a co-expression network derived from the dataset has been

77 reported elsewhere. Here we examined the dataset for transcripts related to plasma  
78 cells and immunoglobulins. DEseq program was used to identify differentially expressed  
79 transcripts with cut-off criteria  $\log_2$  fold change  $> 1$  and q value  $< 0.05$ , after adjusted by  
80 Benjamini and Hochberg's approach. Plasma cell transcripts (*MZB1*, *MS4A1*, *XBP1*,  
81 *SSR4*, *FKBP11*, *TNFRSF13B*, *MCM6*, *DERL43*, *CD38*, *SDC1*, and *PRDM1*),  
82 immunoglobulins (*JCHAIN*, *IGHA1*, *IGHG1*, *IGHG2*, *IGHG4*, and 45 *IGHVs*) were  
83 differentially upregulated in FDG-avid tissues relative to non-avid tissues (Table 1).

84  
85 Lung tissues from six additional subjects were examined for the presence of anti-dsDNA  
86 antibodies and immune deposits. Levels of anti-dsDNA autoantibodies and circulating  
87 immune complexes were significantly higher in FDG-avid tissues than in non-avid  
88 tissues (Fig. 1A). Anti-dsDNA antibodies were the only autoantibodies significantly  
89 higher in FDG-avid from a screen of common autoantibodies.

90  
91 Blood vessels in FDG-avid and non-avid tissues from all six cases had marked  
92 intravascular deposits of immunoglobulin G and C1q (Figs. 1B). They were also positive  
93 for citrullinated histone H3 (cit-HisH3), a marker of neutrophil extracellular trap (NET)  
94 (Figs. 1B). In contrast, two patients with microinvasive adenocarcinoma as control  
95 showed weak deposits of immunoglobulin G and C1q and absence of cit-HisH3 staining  
96 (Fig. 1B).

97  
98 Immune complex is known to induce endothelial injury in lungs through NETs (5).  
99 Additionally, extracellular histone associated with NET causes vascular necrosis in

100 necrotizing glomerulonephritis (6). In five of the six cases, there were increased blood  
101 vessels with necrosis and increased perivascular fibrin deposition in FDG-avid tissues  
102 relative to non-avid tissues and control tissues (Fig. 1B).

103

## 104 **DISCUSSION**

105 Here we reported increased expression of immunoglobulin and plasma cell transcripts  
106 in FDG-avid relative to non-avid tissues from patients with sputum culture-negative  
107 tuberculosis. This finding is consistent with a recent study of patients with latent  
108 tuberculosis in which two patient clusters were identified: the cluster predicted as  
109 infected with tuberculosis had higher expressions of 41 immunoglobulin and 2 plasma  
110 cell transcripts than the cluster predicted as uninfected (7).

111

112 We reported immune complex deposits and NETs in blood vessels of lung tissues from  
113 patients with sputum culture-negative tuberculosis. Immune complexes could activate  
114 neutrophils to produce NETs (8). NETs were also present in vascular lesions in non-  
115 avid tissue peripheral to FDG-avid tissue. This observation is consistent with the  
116 neutrophil-dominant transcriptional response and increased serum levels of NET in the  
117 blood of patients with tuberculosis (3, 9).

118

119 Necrotizing granuloma is a hallmark of pulmonary tuberculosis and is shown to have  
120 abundant NETs (10). Abundant NETs have also been reported in necrotizing  
121 granulomas from patients with granulomatosis with polyangiitis, a small vessel vasculitis  
122 condition in which neutrophils and NETs were associated with necrosis of blood vessels

123 and necrotizing granulomas (10). Generation of the NETs in necrotizing granulomas of  
124 pulmonary tuberculosis could be mediated by the abilities of immune complexes to  
125 induce NET release in neutrophils (8).

126

127 Our observations are consistent with a pathogenic role for immune complexes in  
128 tuberculosis. In support of this, patients with tuberculosis have elevated risks of a  
129 number of immune complex diseases (11). In addition, higher serum levels of circulating  
130 immune complexes were observed in subclinical tuberculosis with high FDG avidity than  
131 in latent tuberculosis (12).

132

133 It is noteworthy to point out that complete Freund's adjuvant (CFA), which contains  
134 heat-killed *Mycobacterium*, is the most potent inducer of antibody response ever  
135 reported (13). When given repeatedly to animal models, the adjuvant induces strong  
136 anti-dsDNA antibody response and immune complex-related pathologies (13, 14).  
137 Indeed, the use of CFA might cause systemic lupus erythematosus, as warned by  
138 Freund in 1956 (15). Taken together, we speculate that *M. tuberculosis*-derived  
139 materials with adjuvant effect might persist in lung lesions of patients with tuberculosis.  
140 We propose that improved techniques for the detection and characterization of the *M.*  
141 *tuberculosis* materials with adjuvant effect may provide insights into the development of  
142 the observed antibody-mediated inflammation and vasculopathy in the inflamed lung  
143 lesions of patients with tuberculosis and may ultimately uncover novel therapeutic  
144 interventions for pulmonary tuberculosis.

145

## 146 **MATERIALS AND METHODS**

### 147 **Patients**

148 All the subjects were confirmed as pulmonary tuberculosis with the presence of  
149 tuberculosis cavity or destruction of lung that cause recurrence of sputum culture-  
150 negative tuberculosis, along with tuberculous pleurisy or other extrapulmonary  
151 tuberculosis. Participants received a preoperative 18F-FDG-PET/CT as a routine  
152 recommendation for surgical planning. Those with metabolic activity by FDG-PET/CT in  
153 the lung were included. Patients with any of the following condition were excluded:  
154 sputum positive for mycobacterium tuberculosis complex by Xpert or culture  
155 (bacteriologically confirmed tuberculosis) before surgery, HIV-positive, tuberculosis  
156 symptoms unfit for surgery (body temperature > 38.5°C, night sweats, weight loss, or  
157 acute massive hemoptysis), diagnosis of malignancy, any clinical condition requiring  
158 systemic steroid or other immunosuppressive medication in the preceding six months,  
159 pregnancy or breastfeeding, and anemia (hemoglobin < 7g/dL). Participants were  
160 informed and signed written consent. This study was approved by the Ethics Committee  
161 of the Shanghai Public Health Clinical Center (2019-S009-02).

162

### 163 **Quantification of circulating immune complex and anti-dsDNA levels in lung** 164 **tissues**

165 18F-avid tissue with an approximate minimal size of 8 cm<sup>3</sup> was selected from resected  
166 lung. Care was taken to exclude tissue with background levels of SUV. A similar size of  
167 non-avid tissue with background SUV signals were also selected. Resected lung tissue  
168 samples were rinsed with PBS, weighed, minced by sterile scissors, and then digested



169 with 100 U/ml of Collagenase IV (Sigma), 50 U/ml of Benzonase in 8 ml RPMI 1640  
170 medium without serum on a rocker at 100 rpm for 45 min at 37°C. Digested tissues  
171 were passed through 100 µm cell strainers and collected in a tube containing 4 ml ice-  
172 cold PBS containing 50% fetal bovine serum to stop digestion. Tissues were collected  
173 by centrifugation at 1800 rpm for 10 min. Supernatants (digested extracts) were filtered  
174 sequentially through 5µm, 0.45µm, and 0.22µm low protein binding PVDF membrane  
175 filters. Levels of circulating immune complexes and anti-double strand DNA antibodies  
176 were assayed by using CIC-C1q ELISA (IBL International GmbH, Germany) and ds-  
177 DNA Ab IgG ELISA (Demeditec Diagnostics GmbH, Germany).

178

### 179 **Immunohistochemistry and histopathology**

180 Tissue samples were fixed with 4% paraformaldehyde, paraffin embedded and  
181 sectioned and stained with hematoxylin and eosin (H&E) or antibodies against human  
182 IgG or citrullinated histone H3. Primary antibodies against human antigens for  
183 immunohistochemistry were mouse monoclonal clone D-1 against IgG at 1:100 dilution  
184 (Santa Cruz Biotech) and rabbit polyclonal ab5103 against histone 3 (citrulline  
185 R2+R8+R17) at 1:100 dilution (abcam). Secondary antibodies were horseradish  
186 peroxidase-conjugated antibodies using the goat anti-mouse or anti-rabbit enhanced  
187 polymer two-Step detection system (ZSGB-Bio, China). Stainings were developed using  
188 ImmPACT(R) DAB EqV Peroxidase Substrate (Vector Laboratories, USA) and  
189 counterstained with hematoxylin. Fibrin was stained by Masson staining. Histological  
190 examinations were confirmed by a certified clinical pathologist.

191

192 **Statistical analysis**

193 Statistical significance of differences between data groups were determined using  
194 GraphPad Prism 8 with the paired Student's t-test (FDG-avid vs. non-avid paired  
195 samples with two-tailed  $p$  values).

196

197

198 **SOURCES OF FUNDING**

199 National Natural Science Foundation of China: 81770010 (K.W.); National Major  
200 Science and Technology Projects of China: 2017ZX10201301-003-002 (Y.S.)

201

202 **ACKNOWLEDGMENTS**

203 We would like to thank Yijun Zhu, Hongwei Li, Lei Shi, Hui Chen, Laiyi Wan, Leilei Li for  
204 performing surgeries on study subjects.

205

206

207 **REFERENCES**

- 208 1. Malherbe ST, Shenai S, Ronacher K, Loxton AG, Dolganov G, Kriel M, Van T,  
209 Chen RY, Warwick J, Via LE, Song T, Lee M, Schoolnik G, Tromp G, Alland D,  
210 Barry CE, 3rd, Winter J, Walzl G, Catalysis TBBC, Lucas L, Spuy GV, Stanley K,  
211 Thiar L, Smith B, Du Plessis N, Beltran CG, Maasdorp E, Ellmann A, Choi H,  
212 Joh J, Dodd LE, Allwood B, Koegelenberg C, Vorster M, Griffith-Richards S.  
213 2016. Persisting positron emission tomography lesion activity and  
214 Mycobacterium tuberculosis mRNA after tuberculosis cure. *Nat Med* 22:1094-  
215 1100.
- 216 2. Lawal IO, Fourie BP, Mathebula M, Moagi I, Lengana T, Moeketsi N, Nchabeleng  
217 M, Hatherill M, Sathekge MM. 2020. (18)F-FDG PET/CT as a Noninvasive  
218 Biomarker for Assessing Adequacy of Treatment and Predicting Relapse in  
219 Patients Treated for Pulmonary Tuberculosis. *J Nucl Med* 61:412-417.
- 220 3. Berry MP, Graham CM, McNab FW, Xu Z, Bloch SA, Oni T, Wilkinson KA,  
221 Banchereau R, Skinner J, Wilkinson RJ, Quinn C, Blankenship D, Dhawan R,  
222 Cush JJ, Mejias A, Ramilo O, Kon OM, Pascual V, Banchereau J, Chaussabel D,  
223 O'Garra A. 2010. An interferon-inducible neutrophil-driven blood transcriptional  
224 signature in human tuberculosis. *Nature* 466:973-7.
- 225 4. Clayton K, Polak ME, Woelk CH, Elkington P. 2017. Gene Expression Signatures  
226 in Tuberculosis Have Greater Overlap with Autoimmune Diseases Than with  
227 Infectious Diseases. *Am J Respir Crit Care Med* 196:655-656.
- 228 5. Ward PA, Fattahi F, Bosmann M. 2016. New Insights into Molecular Mechanisms  
229 of Immune Complex-Induced Injury in Lung. *Front Immunol* 7:86.

- 230 6. Kumar SV, Kulkarni OP, Mulay SR, Darisipudi MN, Romoli S, Thomasova D,  
231 Scherbaum CR, Hohenstein B, Hugo C, Muller S, Liapis H, Anders HJ. 2015.  
232 Neutrophil Extracellular Trap-Related Extracellular Histones Cause Vascular  
233 Necrosis in Severe GN. *J Am Soc Nephrol* 26:2399-413.
- 234 7. Estevez O, Anibarro L, Garet E, Pallares A, Barcia L, Calvino L, Maueia C,  
235 Mussa T, Fdez-Riverola F, Glez-Pena D, Reboiro-Jato M, Lopez-Fernandez H,  
236 Fonseca NA, Reljic R, Gonzalez-Fernandez A. 2020. An RNA-seq Based  
237 Machine Learning Approach Identifies Latent Tuberculosis Patients With an  
238 Active Tuberculosis Profile. *Front Immunol* 11:1470.
- 239 8. Behnen M, Leschczyk C, Moller S, Batel T, Klinger M, Solbach W, Laskay T.  
240 2014. Immobilized immune complexes induce neutrophil extracellular trap  
241 release by human neutrophil granulocytes via FcγRIIIB and Mac-1. *J*  
242 *Immunol* 193:1954-65.
- 243 9. Schechter MC, Buac K, Adekambi T, Cagle S, Celli J, Ray SM, Mehta CC, Rada  
244 B, Rengarajan J. 2017. Neutrophil extracellular trap (NET) levels in human  
245 plasma are associated with active TB. *PLoS One* 12:e0182587.
- 246 10. Masuda S, Nonokawa M, Futamata E, Nishibata Y, Iwasaki S, Tsuji T, Hatanaka  
247 Y, Nakazawa D, Tanaka S, Tomaru U, Kawakami T, Atsumi T, Ishizu A. 2019.  
248 Formation and Disordered Degradation of Neutrophil Extracellular Traps in  
249 Necrotizing Lesions of Anti-Neutrophil Cytoplasmic Antibody-Associated  
250 Vasculitis. *Am J Pathol* 189:839-846.

- 251 11. Ramagopalan SV, Goldacre R, Skingsley A, Conlon C, Goldacre MJ. 2013.  
252 Associations between selected immune-mediated diseases and tuberculosis:  
253 record-linkage studies. *BMC Med* 11:97.
- 254 12. Esmail H, Lai RP, Lesosky M, Wilkinson KA, Graham CM, Horswell S, Coussens  
255 AK, Barry CE, 3rd, O'Garra A, Wilkinson RJ. 2018. Complement pathway gene  
256 activation and rising circulating immune complexes characterize early disease in  
257 HIV-associated tuberculosis. *Proc Natl Acad Sci U S A* 115:E964-E973.
- 258 13. Billiau A, Matthys P. 2001. Modes of action of Freund's adjuvants in experimental  
259 models of autoimmune diseases. *J Leukoc Biol* 70:849-60.
- 260 14. Bassi N, Luisetto R, Del Prete D, Ghirardello A, Ceol M, Rizzo S, Iaccarino L,  
261 Gatto M, Valente ML, Punzi L, Doria A. 2012. Induction of the 'ASIA' syndrome in  
262 NZB/NZWF1 mice after injection of complete Freund's adjuvant (CFA). *Lupus*  
263 21:203-9.
- 264 15. Chapel HM, August PJ. 1976. Report of nine cases of accidental injury to man  
265 with Freund's complete adjuvant. *Clin Exp Immunol* 24:538-41.  
266  
267

268 **Table 1** Increased abundance in transcripts related to plasma cells and  
 269 immunoglobulins in FDG-avid tissue relative to non-avid tissue from patients with  
 270 sputum culture-negative tuberculosis. Plasma cell-related transcripts were identified by  
 271 literature and their features were shown. Transcript counts in FDG-avid tissue (A) and in  
 272 Non-avid tissue (N) were displayed in transcript per million, such that total counts from  
 273 all transcripts were normalized to one million. Fold differences of transcript between the  
 274 two samples (FDG-avid tissue/Non-avid tissue) were depicted as the logarithm to the  
 275 base 2, log<sub>2</sub>FC. q-value represents p-value adjusted for multiple testing using  
 276 Benjamini-Hochberg method. Function of each plasma cell-related gene was referenced  
 277 with PubMed ID number.

| gene_name                        | Transcript_id     | N     | A     | log <sub>2</sub> F |      | q value  | significant | Function                                                     |
|----------------------------------|-------------------|-------|-------|--------------------|------|----------|-------------|--------------------------------------------------------------|
|                                  |                   |       |       |                    | C    |          |             |                                                              |
| <i>Plasma Cell-Related Genes</i> |                   |       |       |                    |      |          |             |                                                              |
| MZB1                             | ENST00000302125.8 | 3.7   | 40.45 |                    | 3.45 | 5.18E-29 | yes         | B cell differentiation into plasma cell (30257949)           |
| SSR4                             | ENST00000370086.7 | 4.14  | 20.39 |                    | 2.3  | 7.75E-08 | yes         | Plasma cell marker in a single-cell RNA-seq study (31474370) |
| XBP1                             | ENST00000344347.5 | 8.9   | 31.03 |                    | 1.8  | 9.59E-08 | yes         | Plasma cell marker in a single-cell RNA-seq study (31474370) |
| XBP1                             | ENST00000405219.7 | 12.85 | 27.78 |                    | 1.11 | 7.34E-02 | yes         | Plasma cell marker in a single-cell RNA-seq study (31474370) |
| FKBP11                           | ENST00000550765.5 | 0.47  | 3.94  |                    | 3.06 | 8.35E-02 | yes         | Plasma cell marker in a single-cell RNA-seq study (31474370) |
| MCM6                             | ENST00000264156.2 | 0.03  | 1.93  |                    | 6.13 | 2.60E-01 | yes         | Plasmablast marker upregulated in SLE (Fig. 2 in 27259156)   |

|                             |                    |       |            |      |           |     |                                                               |
|-----------------------------|--------------------|-------|------------|------|-----------|-----|---------------------------------------------------------------|
| DERL3                       | ENST00000476077.1  | 0.28  | 2.76       | 3.32 | 2.71E-01  | yes | Plasma cell marker in a single-cell RNA-seq study (31474370)  |
| FKBP11                      | ENST00000453172.2  | 0.14  | 2.1        | 3.94 | 3.92E-01  | yes | Initiate plasma cell differentiation (26417441)               |
| DERL3                       | ENST00000404056.1  | 0.2   | 2.22       | 3.49 | 4.76E-01  | yes | Plasma cell marker in a single-cell RNA-seq study (31474370)  |
| DERL3                       | ENST00000318109.11 | 0.55  | 2.91       | 2.41 | 8.31E-01  | yes | Plasma cell marker in a single-cell RNA-seq study (31474370)  |
| SDC1                        | ENST00000381150.5  | 4.37  | 8.91       | 1.03 | 1.00E+00  | no  | Plasma cell marker, also known as CD138 (15345222)            |
| CD38                        | ENST00000226279.7  | 1.44  | 5.82       | 2.02 | 2.47E-01  | yes | Highly expressed in plasma cell (15020647)                    |
| PRDM1                       | ENST00000369096.8  | 5.69  | 12.25      | 1.11 | 1.00E+00  | yes | Master regulator of plasma cell differentiation (8168136)     |
| TNFRSF13B                   | ENST00000583789.1  | 0.09  | 0.84       | 3.3  | 1.00E+00  | no  | Mediate plasma cell survival (22949644)                       |
| JCHAIN                      | ENST00000254801.8  | 48.96 | 80.5       | 0.72 | 3.64E-01  | no  | A plasma cell signature gene in autoimmune disease (24431284) |
| IGKC                        | MSTRG.147376.2     | 39.31 | 146.3<br>7 | 1.9  | 2.60E-44  | yes | A plasma cell signature gene in autoimmune disease (24431284) |
| IGHA1                       | ENST00000641837.1  | 3.09  | 22.43      | 2.86 | 2.72E-12  | yes | A plasma cell signature gene in autoimmune disease (24431284) |
| IGKV4-1                     | ENST00000390243.2  | 14.28 | 159.5<br>9 | 3.48 | 5.76E-119 | yes | A plasma cell signature gene in autoimmune disease (24431284) |
| <b>Immunoglobulin Genes</b> |                    |       |            |      |           |     |                                                               |
| IGHE                        | ENST00000641420.1  | 0.05  | 0.71       | 3.87 | 1.00E+00  | no  |                                                               |
| IGHG1                       | ENST00000390548.6  | 13.52 | 242.3<br>8 | 4.16 | 1.72E-213 | yes |                                                               |

|          |                   |       |       |      |           |     |
|----------|-------------------|-------|-------|------|-----------|-----|
| IGHG3    | ENST00000641136.1 | 0.28  | 12.85 | 5.51 | 4.80E-12  | yes |
| IGHGP    | ENST00000390555.3 | 0.44  | 12.76 | 4.85 | 2.37E-11  | yes |
| IGHG2    | ENST00000641095.1 | 0.73  | 9.54  | 3.7  | 1.23E-06  | yes |
| IGHG4    | ENST00000641978.1 | 0     | 1.4   | 7.14 | 1.00E+00  | yes |
|          |                   |       | 303.1 |      |           |     |
| IGHV3-7  | ENST00000390598.2 | 17.73 | 9     | 4.1  | 4.98E-264 | yes |
|          |                   |       | 190.1 |      |           |     |
| IGHV3-23 | ENST00000390609.3 | 26.9  | 1     | 2.82 | 3.48E-110 | yes |
|          |                   |       | 125.4 |      |           |     |
| IGHV3-15 | ENST00000390603.2 | 9.12  | 2     | 3.78 | 3.33E-101 | yes |
|          |                   |       | 144.6 |      |           |     |
| IGHV3-30 | ENST00000603660.1 | 15.12 | 1     | 3.26 | 4.73E-100 | yes |
| IGHV1-3  | ENST00000390595.3 | 0.47  | 96.47 | 7.69 | 7.95E-93  | yes |
|          |                   |       | 106.3 |      |           |     |
| IGHV3-9  | ENST00000390600.2 | 6.59  | 9     | 4.01 | 3.09E-90  | yes |
|          |                   |       | 107.7 |      |           |     |
| IGHV4-39 | ENST00000390619.2 | 9.12  | 2     | 3.56 | 7.53E-82  | yes |
| IGHV5-51 | ENST00000390626.2 | 4.56  | 85.47 | 4.23 | 2.52E-75  | yes |
| IGHV2-5  | ENST00000390597.3 | 4.95  | 86.02 | 4.12 | 2.72E-74  | yes |
| IGHV1-18 | ENST00000390605.2 | 9     | 97.47 | 3.44 | 3.47E-71  | yes |
| IGHV3-21 | ENST00000390607.2 | 7.03  | 87.54 | 3.64 | 9.94E-68  | yes |
| IGHV3-33 | ENST00000390615.2 | 10.61 | 96.49 | 3.19 | 1.19E-64  | yes |
|          |                   |       | 141.8 |      |           |     |
| IGHV4-59 | ENST00000390629.3 | 28.71 | 1     | 2.3  | 1.68E-60  | yes |
| IGHV1-2  | ENST00000390594.3 | 4.97  | 62.72 | 3.66 | 1.95E-48  | yes |
| IGHV4-34 | ENST00000390616.2 | 5.3   | 59.44 | 3.49 | 1.18E-43  | yes |
| IGHV6-1  | ENST00000390593.2 | 2.43  | 42.24 | 4.12 | 6.37E-36  | yes |
| IGHV1-24 | ENST00000390610.2 | 5.66  | 51.04 | 3.17 | 1.73E-33  | yes |
| IGHV1-69 | ENST00000390633.2 | 2.45  | 33.73 | 3.78 | 2.25E-26  | yes |



|           |                   |      |       |      |           |     |
|-----------|-------------------|------|-------|------|-----------|-----|
| IGHV2-26  | ENST00000390611.2 | 8.15 | 48.98 | 2.59 | 2.68E-24  | yes |
| IGHV3-74  | ENST00000424969.2 | 5.21 | 39.07 | 2.91 | 1.15E-22  | yes |
| IGHV3-43  | ENST00000434710.1 | 1.36 | 21.84 | 4.01 | 1.26E-17  | yes |
| IGHV3-49  | ENST00000390625.3 | 3.02 | 26.67 | 3.14 | 8.72E-17  | yes |
| IGHV3-73  | ENST00000390636.2 | 0.78 | 16.66 | 4.42 | 2.66E-14  | yes |
| IGHV4-31  | ENST00000438142.2 | 5.33 | 30.2  | 2.5  | 7.92E-14  | yes |
| IGHV3-72  | ENST00000621503.1 | 0.25 | 13.87 | 5.8  | 3.22E-13  | yes |
| IGHV1-8   | ENST00000390599.2 | 1.83 | 17.6  | 3.26 | 2.79E-11  | yes |
| IGHV3-53  | ENST00000390627.3 | 1.41 | 14.81 | 3.39 | 8.77E-10  | yes |
| IGHV1-46  | ENST00000390622.2 | 0.9  | 11.15 | 3.63 | 9.65E-08  | yes |
| IGHV2-70  | ENST00000617374.2 | 2.22 | 14.93 | 2.75 | 1.95E-07  | yes |
| IGHV3-20  | ENST00000390606.3 | 1.56 | 11.17 | 2.84 | 1.23E-05  | yes |
| IGHV4-4   | ENST00000390596.2 | 0.17 | 5.22  | 4.96 | 3.23E-04  | yes |
| IGHV3-13  | ENST00000390602.3 | 1.19 | 8.45  | 2.82 | 4.84E-04  | yes |
| IGHV3-64  | ENST00000454421.2 | 0.43 | 3.23  | 2.92 | 2.68E-01  | yes |
| IGHV3-66  | ENST00000390632.2 | 0.11 | 1.82  | 4.11 | 5.52E-01  | yes |
| IGHV1-58  | ENST00000390628.3 | 0.29 | 2.27  | 2.99 | 7.40E-01  | yes |
| IGHV1OR15 |                   |      |       |      |           |     |
| -1        | ENST00000604066.1 | 0.39 | 2.04  | 2.4  | 1.00E+00  | yes |
| IGHV4-61  | ENST00000390630.3 | 2.89 | 6.96  | 1.27 | 1.00E+00  | yes |
| IGHV3-65  | ENST00000523210.1 | 0    | 0.57  | 7.6  | 1.00E+00  | no  |
|           |                   |      | 126.4 |      |           |     |
| IGLV1-44  | ENST00000390297.3 | 8.55 | 4     | 3.89 | 1.43E-104 | yes |
| IGLV1-51  | ENST00000390290.3 | 8.75 | 91.3  | 3.38 | 1.63E-65  | yes |
| IGLV3-19  | ENST00000390309.2 | 8.95 | 80.35 | 3.17 | 2.90E-53  | yes |
| IGLV1-40  | ENST00000390299.2 | 2.64 | 49.46 | 4.23 | 4.06E-43  | yes |

|          |                   |       |       |       |          |           |     |
|----------|-------------------|-------|-------|-------|----------|-----------|-----|
| IGLV6-57 | ENST00000390285.4 | 3.18  | 51.27 | 4.01  | 7.29E-43 | yes       |     |
| IGLV1-47 | ENST00000390294.2 | 8.3   | 59.03 | 2.83  | 1.47E-33 | yes       |     |
| IGLV8-61 | ENST00000390283.2 | 8.91  | 59.88 | 2.75  | 1.07E-32 | yes       |     |
| IGLV2-23 | ENST00000390306.2 | 4.11  | 37.18 | 3.18  | 3.82E-24 | yes       |     |
| IGLV7-46 | ENST00000390295.3 | 3.44  | 28.1  | 3.03  | 6.49E-17 | yes       |     |
| IGLV3-25 | ENST00000390305.2 | 1.72  | 21.84 | 3.67  | 3.22E-16 | yes       |     |
| IGLV3-10 | ENST00000390315.3 | 1.89  | 20.96 | 3.47  | 1.20E-14 | yes       |     |
| IGLV2-18 | ENST00000390310.3 | 1.91  | 20.92 | 3.45  | 1.62E-14 | yes       |     |
| IGLV3-21 | ENST00000390308.2 | 0.72  | 15.99 | 4.46  | 9.01E-14 | yes       |     |
| IGLV4-69 | ENST00000390282.2 | 1.22  | 15.07 | 3.63  | 8.91E-11 | yes       |     |
| IGLV9-49 | ENST00000427632.2 | 0.49  | 5.38  | 3.47  | 3.70E-03 | yes       |     |
| IGLV2-8  | ENST00000620395.2 | 3.42  | 0.4   | -3.11 | 7.11E-03 | yes       |     |
| IGLV3-9  | ENST00000390316.2 | 0.71  | 5.28  | 2.9   | 2.18E-02 | yes       |     |
| IGLV2-11 | ENST00000390314.2 | 14.9  | 37.16 | 1.32  | 1.88E-04 | yes       |     |
| IGLV5-45 | ENST00000390296.2 | 2.3   | 7.78  | 1.76  | 2.14E-01 | yes       |     |
| IGLV7-43 | ENST00000390298.2 | 2.36  | 7.49  | 1.67  | 3.69E-01 | yes       |     |
| IGLV3-27 | ENST00000390304.2 | 0.23  | 2.31  | 3.32  | 4.95E-01 | yes       |     |
| IGLV4-60 | ENST00000390284.2 | 0.27  | 2.22  | 3.03  | 7.44E-01 | yes       |     |
| IGLV5-37 | ENST00000390300.2 | 0.1   | 1.63  | 4.04  | 7.72E-01 | yes       |     |
| IGLV1-36 | ENST00000390301.3 | 0.96  | 3.74  | 1.97  | 1.00E+00 | yes       |     |
| IGLV2-34 | ENST00000490007.2 | 0.16  | 1     | 2.67  | 1.00E+00 | no        |     |
| IGLV3-16 | ENST00000390311.3 | 0.06  | 0.64  | 3.5   | 1.00E+00 | no        |     |
| IGKV3-20 | ENST00000492167.1 | 4.74  | 165.0 | 9     | 5.12     | 1.57E-163 | yes |
| IGKV3-11 | ENST00000483158.1 | 10.28 | 171.3 | 6     | 4.06     | 1.95E-147 | yes |

|           |                   |       |       |      |           |     |
|-----------|-------------------|-------|-------|------|-----------|-----|
|           |                   |       | 159.5 |      |           |     |
| IGKV4-1   | ENST00000390243.2 | 14.28 | 9     | 3.48 | 5.76E-119 | yes |
|           |                   |       | 131.9 |      |           |     |
| IGKV1-5   | ENST00000496168.1 | 10.61 | 5     | 3.64 | 1.30E-102 | yes |
|           |                   |       | 110.3 |      |           |     |
| IGKV1-39  | ENST00000498574.1 | 8.69  | 1     | 3.67 | 2.88E-86  | yes |
| IGKV2D-28 | ENST00000558026.1 | 2.27  | 84.02 | 5.21 | 3.51E-83  | yes |
|           |                   |       | 103.0 |      |           |     |
| IGKV1D-39 | ENST00000448155.2 | 10.1  | 1     | 3.35 | 3.18E-73  | yes |
| IGKV1-33  | ENST00000473726.1 | 7.17  | 75.43 | 3.39 | 4.16E-54  | yes |
| IGKV1-9   | ENST00000493819.1 | 4.11  | 59.96 | 3.87 | 9.70E-49  | yes |
| IGKV1-16  | ENST00000479981.1 | 4     | 51.24 | 3.68 | 1.35E-39  | yes |
| IGKV1-17  | ENST00000490686.1 | 2.46  | 45.51 | 4.21 | 1.90E-39  | yes |
| IGKV3-15  | ENST00000390252.2 | 8.1   | 61.91 | 2.93 | 4.97E-37  | yes |
| IGKV1-6   | ENST00000464162.1 | 2.06  | 38.32 | 4.21 | 4.60E-33  | yes |
| IGKV1D-13 | ENST00000611391.1 | 1.18  | 22.83 | 4.28 | 1.79E-19  | yes |
| IGKV2-24  | ENST00000484817.1 | 1.44  | 23.74 | 4.04 | 2.12E-19  | yes |
| IGKV3D-15 | ENST00000417279.3 | 3.17  | 26.46 | 3.06 | 4.24E-16  | yes |
| IGKV2-28  | ENST00000482769.1 | 2.4   | 23.54 | 3.3  | 1.38E-15  | yes |
| IGKV3D-20 | ENST00000390270.2 | 0.39  | 13.72 | 5.12 | 1.28E-12  | yes |
| IGKV1-27  | ENST00000498435.1 | 4.21  | 23.53 | 2.48 | 1.92E-10  | yes |
| IGKV1D-12 | ENST00000390276.2 | 0.72  | 9.95  | 3.78 | 4.09E-07  | yes |
| IGKV6D-21 | ENST00000436451.2 | 3.5   | 15.35 | 2.13 | 6.52E-05  | yes |
| IGKV2-30  | ENST00000468494.1 | 8.07  | 22.88 | 1.5  | 1.47E-03  | yes |
| IGKV2-40  | ENST00000621595.1 | 0.13  | 4.43  | 5.13 | 1.57E-03  | yes |
| IGKV1-8   | ENST00000495489.1 | 0.89  | 6.41  | 2.85 | 6.17E-03  | yes |
| IGKV2D-40 | ENST00000560045.1 | 0.14  | 2.69  | 4.31 | 1.04E-01  | yes |

|           |                   |      |       |      |          |     |
|-----------|-------------------|------|-------|------|----------|-----|
| IGKV2-29  | ENST00000521304.1 | 0.99 | 4.86  | 2.29 | 2.16E-01 | yes |
| IGKV1D-16 | ENST00000492446.1 | 0.33 | 2.8   | 3.08 | 3.54E-01 | yes |
| IGKV1-12  | ENST00000480492.1 | 6.25 | 14.74 | 1.24 | 3.60E-01 | yes |
| IGKV2D-30 | ENST00000474213.1 | 1.39 | 4.9   | 1.82 | 7.67E-01 | yes |
| IGKV5-2   | ENST00000390244.2 | 0.2  | 1.95  | 3.29 | 8.01E-01 | yes |
| IGKV2D-24 | ENST00000462693.1 | 0.02 | 0.81  | 5.06 | 1.00E+00 | no  |
| IGKV1-13  | ENST00000521705.1 | 0.09 | 0.91  | 3.32 | 1.00E+00 | no  |
| IGKV3D-11 | ENST00000390277.3 | 0.18 | 1.02  | 2.46 | 1.00E+00 | no  |
| IGKV6-21  | ENST00000390256.2 | 3.81 | 7.38  | 0.96 | 1.00E+00 | no  |

---

278

279

280 **FIG 1** Immunohistochemical and histological features in blood vessels of FDG-avid lung  
281 tissues resected from patients with sputum culture-negative tuberculosis. (A)  
282 Summarized results (mean  $\pm$  SD, n = 6, paired Student's t-test) for levels of anti-dsDNA  
283 antibody and circulating immune complexes by weight in the supernatants of FDG-avid  
284 and non-avid lung tissues after digestion. (B) Enhanced deposits of IgG and C1q, and  
285 labeling of citrullinated histone H3 on vessel walls in FDG-avid and non-avid lung  
286 tissues (n = 6) relative to two control tissues. Lesions of blood vessels with necrosis  
287 (Arrowheads, H&E, Hematoxylin and Eosin staining) and increased perivascular fibrin  
288 deposition (Masson staining) in FDG-avid relative to non-avid and control tissues. Scale  
289 bar, 50 $\mu$ m.  
290

**A**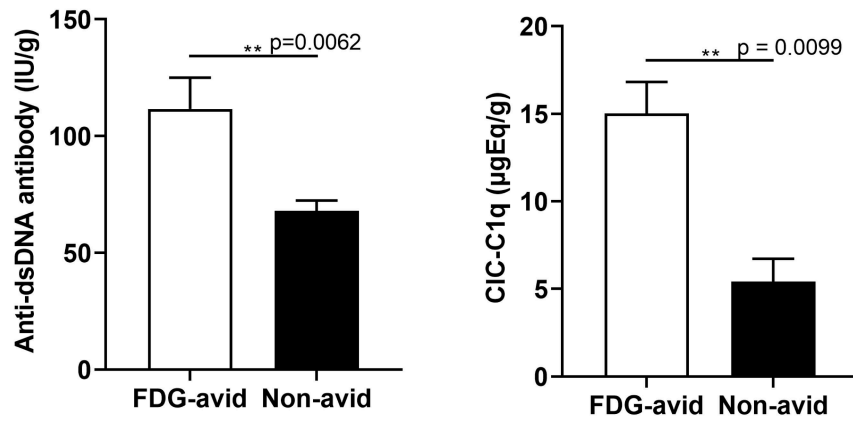**B**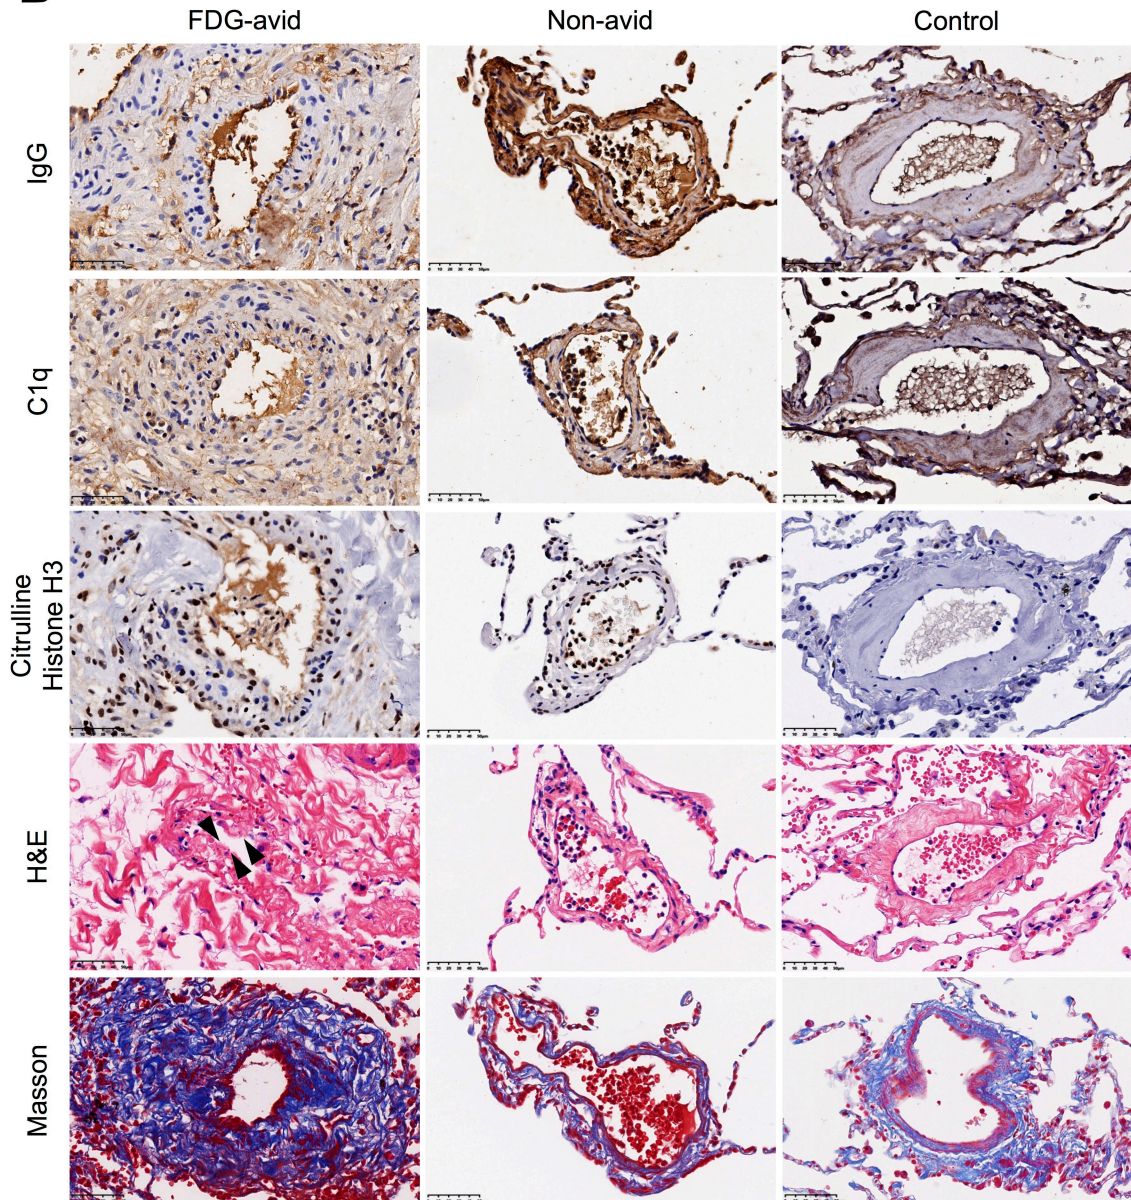

Source: http://biorxiv.org/content/10.1101/2021.02.09.430558v1.full.pdf
